# Supplementary material
Source: HighWire-hosted journal article supplement (https://erj.ersjournals.com/content/58/4/2004498)

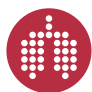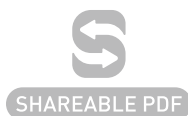

# Effect of exacerbation history on clinical response to dupilumab in moderate-to-severe uncontrolled asthma

Jonathan Corren<sup>1</sup>, Constance H. Katelaris<sup>2,3</sup>, Mario Castro<sup>4</sup>, Jorge F. Maspero<sup>5</sup>, Linda B. Ford<sup>6</sup>, David M.G. Halpin<sup>7</sup>, Megan S. Rice<sup>8</sup>, Amr Radwan<sup>9</sup>, Yamo Deniz<sup>9</sup>, Paul J. Rowe<sup>10</sup>, Ariel Teper<sup>10</sup> and Michel Djandji<sup>8</sup>

<sup>1</sup>David Geffen School of Medicine at UCLA, Los Angeles, CA, USA. <sup>2</sup>Campbelltown Hospital, Campbelltown, Australia. <sup>3</sup>Sydney University, Sydney, Australia. <sup>4</sup>University of Kansas School of Medicine, Kansas City, KS, USA. <sup>5</sup>Fundación CIDEA, Buenos Aires, Argentina. <sup>6</sup>The Asthma and Allergy Center, Bellevue, NE, USA. <sup>7</sup>University of Exeter, Exeter, UK. <sup>8</sup>Sanofi, Cambridge, MA, USA. <sup>9</sup>Regeneron Pharmaceuticals, Inc., Tarrytown, NY, USA. <sup>10</sup>Sanofi, Bridgewater, NJ, USA.

Corresponding author: Jonathan Corren ([jcorren@ucla.edu](mailto:jcorren@ucla.edu))

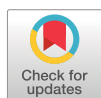

Shareable abstract (@ERSpublications)

**Dupilumab reduced severe exacerbations and improved lung function and asthma control in patients with type 2-high asthma, irrespective of exacerbation history and baseline ICS dose. These data will aid clinicians managing patients with severe disease.** <https://bit.ly/2PjnSm6>

**Cite this article as:** Corren J, Katelaris CH, Castro M, *et al.* Effect of exacerbation history on clinical response to dupilumab in moderate-to-severe uncontrolled asthma. *Eur Respir J* 2021; 58: 2004498 [DOI: 10.1183/13993003.04498-2020].

This single-page version can be shared freely online.

Copyright ©The authors 2021.

This version is distributed under the terms of the Creative Commons Attribution Non-Commercial Licence 4.0. For commercial reproduction rights and permissions contact [permissions@ersnet.org](mailto:permissions@ersnet.org)

This article has supplementary material available from [erj.ersjournals.com](http://erj.ersjournals.com)

Received: 11 Dec 2020  
Accepted: 16 March 2021

## Abstract

**Background** The phase 3 LIBERTY ASTHMA QUEST study (ClinicalTrials.gov: NCT02414854) in patients with uncontrolled, moderate-to-severe asthma has demonstrated the efficacy and safety of dupilumab 200 and 300 mg every 2 weeks *versus* placebo. This *post hoc* analysis assessed the effect of dupilumab on efficacy outcomes and asthma control across a range of historical exacerbation rates in patients with type 2-high asthma.

**Methods** Annualised severe exacerbation rates over the 52-week treatment period, pre-bronchodilator forced expiratory volume in 1 s (FEV<sub>1</sub>) at weeks 12 and 52, and the five-item Asthma Control Questionnaire (ACQ-5) score at weeks 24 and 52 were assessed in patients with  $\geq 1$ ,  $\geq 2$  or  $\geq 3$  exacerbations in the previous year. Subgroups were stratified by baseline blood eosinophils  $\geq 150$  or  $\geq 300$  cells· $\mu\text{L}^{-1}$  or baseline exhaled nitric oxide fraction  $\geq 25$  ppb and baseline inhaled corticosteroid (ICS) dose.

**Results** Across all type 2-high subgroups, dupilumab *versus* placebo significantly reduced severe exacerbations by 54–90%, with greater improvements in patients with more exacerbations prior to study initiation. Similarly, improvements in FEV<sub>1</sub> (least squares (LS) mean difference *versus* placebo:  $\geq 1$  exacerbations, 0.15–0.25 L;  $\geq 2$  exacerbations, 0.12–0.32 L;  $\geq 3$  exacerbations, 0.09–0.38 L; majority  $p < 0.05$ ) and ACQ-5 score (LS mean difference range:  $\geq 1$  exacerbations, –0.30 to –0.57;  $\geq 2$  exacerbations, –0.29 to –0.56;  $\geq 3$  exacerbations, –0.43 to –0.61; all  $p < 0.05$ ) were observed, irrespective of prior exacerbation history, across all subgroups.

**Conclusions** Dupilumab significantly reduced severe exacerbations and improved FEV<sub>1</sub> and asthma control in patients with elevated type 2 biomarkers irrespective of exacerbation history and baseline ICS dose.

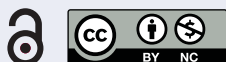

Supplement: inline-supplementary-material-2 [file inline-supplementary-material-2.pdf]
